# Supplementary material for: Microglia-independent peripheral neuropathic pain in male and female mice
Source: PubMed Central journal article supplement — Pain. 2022 Apr 4;163(11):e1129–44. doi: 10.1097/j.pain.0000000000002643 (PMC9578531; doi:10.1097/j.pain.0000000000002643), 2022-04-04
Supplement: jop-163-e1129-s001.pdf [file jop-163-e1129-s001.pdf]

# Supplementary Information

## **Microglia-independent peripheral neuropathic pain in male and female mice**

YuShan Tu, Milind M. Muley, Simon Beggs, Michael W. Salter\*

\*Corresponding author. Email: [michael.salter@sickkids.ca](mailto:michael.salter@sickkids.ca)

### **This Supplementary Information file includes:**

Supplementary Figures 1 to 10  
Supplementary Table 1

a)

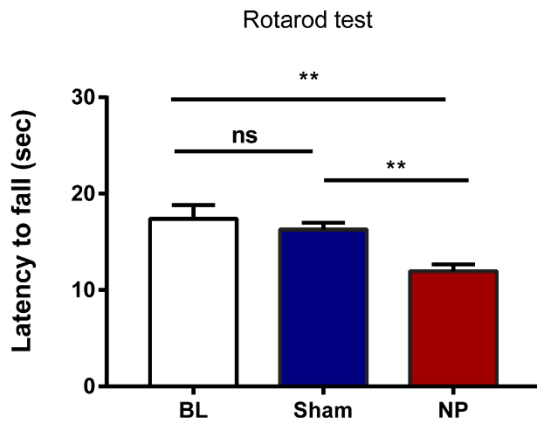

b)

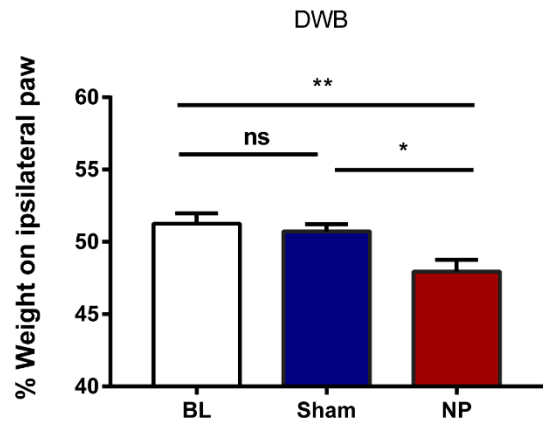

**Supplementary Figure 1. Rotarod test and dynamic weight bearing test after the NP exposure at day 5.**

(a) Accelerating rotarod test. Average latency time on the rod was measured at baseline (BL) and 5 days after the NP exposure in sham-operated ( $n=23$ ) and NP-exposed mice ( $n=26$ ). (b) Dynamic weight bearing test of sham-operated ( $n=10$ ) and NP-exposed ( $n=13$ ) mice at baseline (BL) and 5 days after NP exposure. Comparisons were made by Kruskal-Wallis test with Dunn's multiple comparisons test (a), or one-way ANOVA (b).  $*p<0.05$ ,  $**p<0.01$ ;  $ns>0.05$ . All data are mean  $\pm$  SEM.

a)

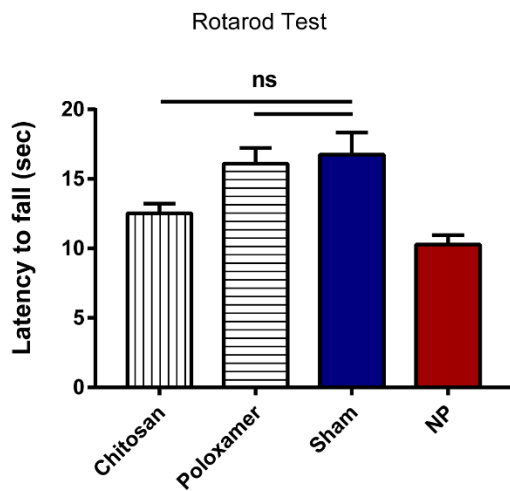

b)

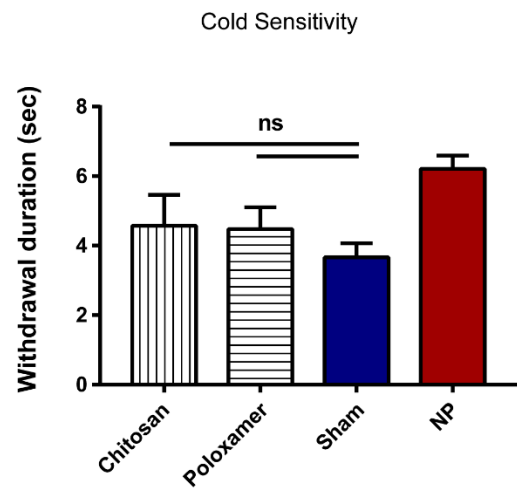

**Supplementary Figure 2. Rotarod and acetone test after the exposure of space-filling mass at day 5.**

(a) Accelerating rotarod test. Average latency time (in seconds) on the rod was measured 5 days after surgery for sham ( $n=4$ ) and applications of chitosan, poloxamer or NP ( $n=7$  per group) on the sciatic nerve. (b) Cold sensitivity, measured by withdrawal duration (in seconds) using acetone test, in the ipsilateral paws of sham controls ( $n=4$ ) and animals with the application of chitosan, poloxamer or NP ( $n=7$  per group) at day 5. Comparisons were made by Kruskal-Wallis test, Dunn's multiple comparisons test (a, b).  $**p<0.01$ ,  $****p<0.0001$ ;  $ns>0.05$ . All data are mean  $\pm$  SEM.

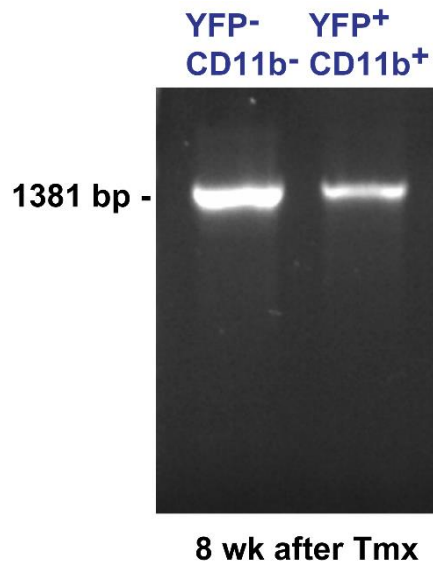

**Supplementary Figure 3. PCR analysis of BDNF recombination from the blood of *CX<sub>3</sub>CRI<sup>CreER/+</sup>;BDNF<sup>fl/fl</sup>* male mice.**

PCR analysis of the YFP<sup>-</sup>/CD11b<sup>-</sup> or YFP<sup>+</sup>/CD11b<sup>+</sup> cells sorted from the blood of *CX<sub>3</sub>CRI<sup>CreER/+</sup>;BDNF<sup>fl/fl</sup>* mice, in which YFP is constitutively expressed in CreER-expressing cells (see Methods), eight weeks after tamoxifen treatment.

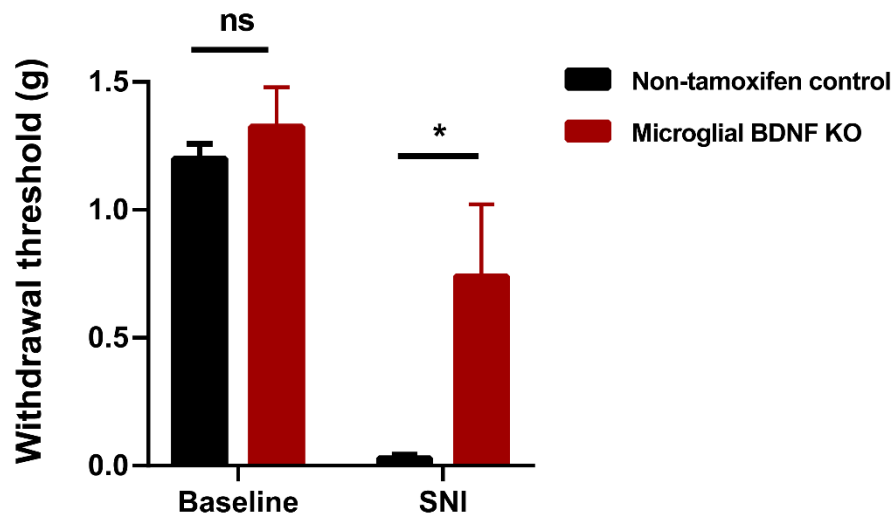

**Supplementary Figure 4. Microglial BDNF knockout (KO) male mice fail to develop mechanical sensitivity following spared nerve injury (SNI).**

Withdrawal threshold from von Frey filaments in  $CX3CRI^{CreER/+};BDNF^{fl/fl}$  male mice that had received tamoxifen (microglial BDNF KO), at baseline and eight weeks post SNI surgery ( $n=4$  mice/condition). Corn oil served as vehicle. The control mice were the identical genotype but received corn oil without tamoxifen. Comparisons were made by unpaired T-test.  $*p<0.05$ . All data are mean  $\pm$  SEM.

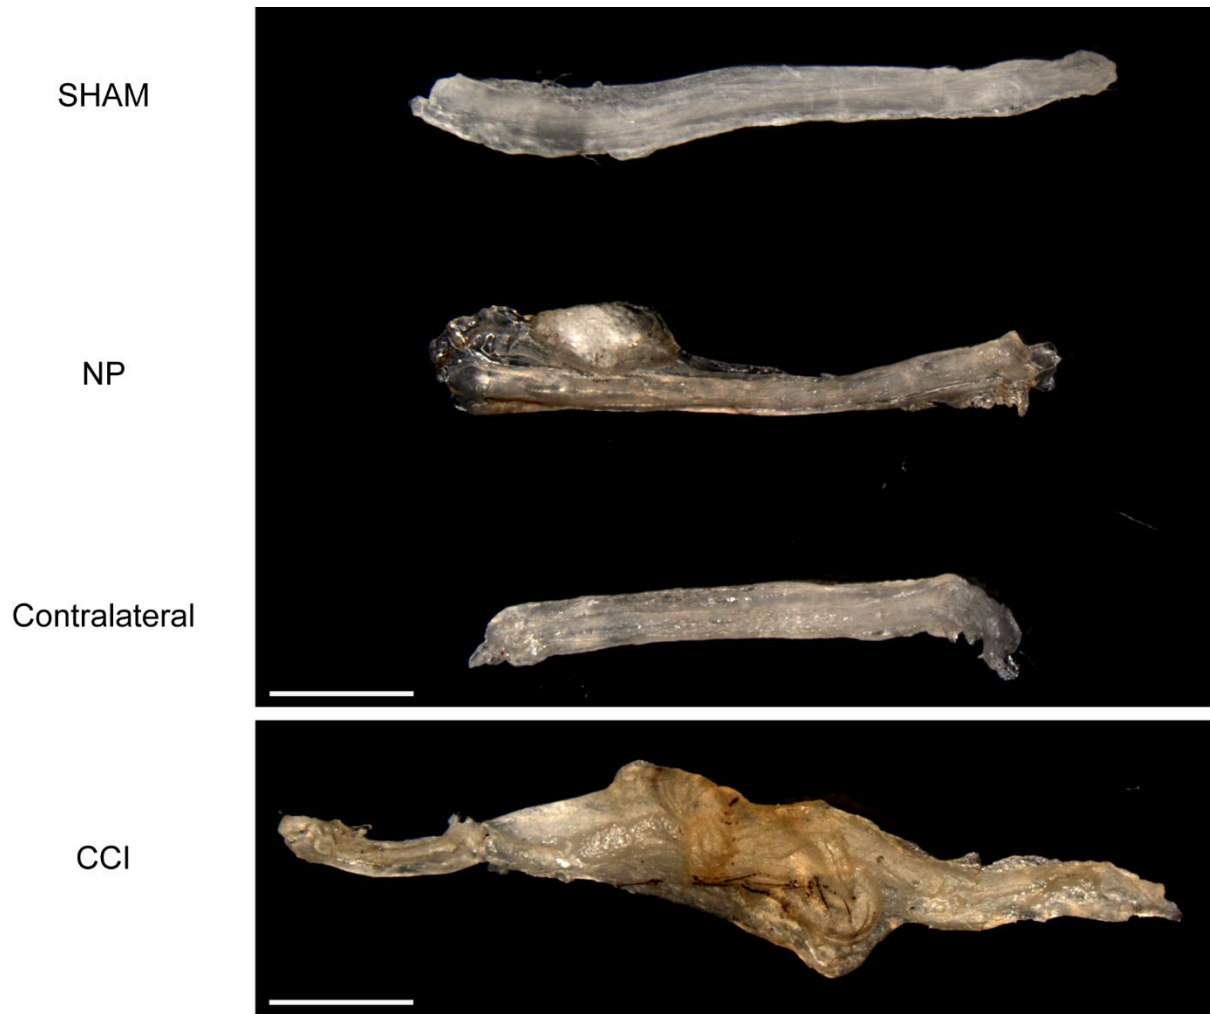

**Supplementary Figure 5. Stereoscopic view of sciatic nerves following sham, NP and CCI surgery.**

Stereoscopic view of sciatic nerve following sham (upper), NP (ipsilateral and contralateral, center) and CCI (lower) surgery. Scale bar, 360 $\mu$ m.

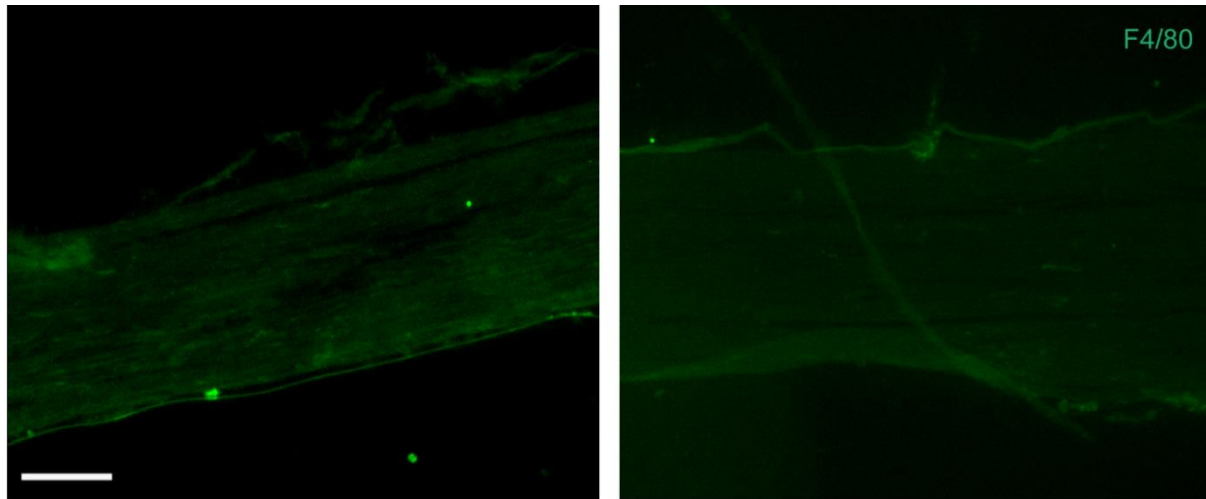

Chitosan

Poloxamer

**Supplementary Figure 6. F4/80 staining of sciatic nerves from animals receiving chitosan or poloxamer at day 7.**

Scale bar, 120 $\mu$ m.

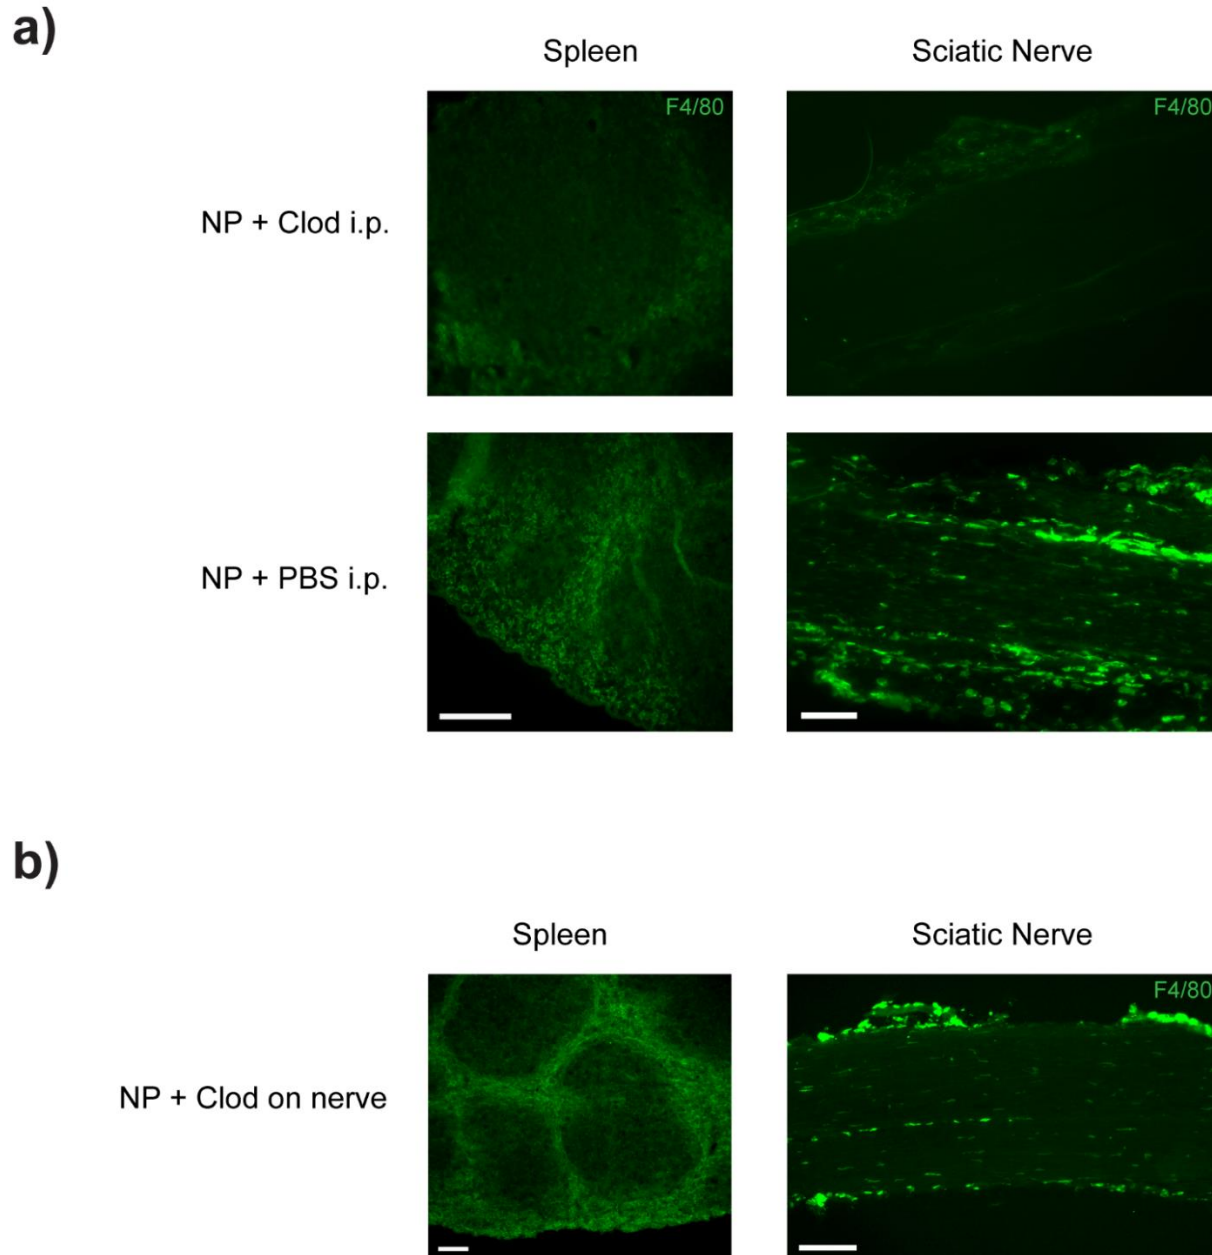

**Supplementary Figure 7. F4/80 staining of spleen and sciatic nerves from NP-exposed animals following the administration of clodronate liposome.**

**(a)** F4/80 staining of spleen and sciatic nerves from NP-exposed animals receiving PBS or clodronate liposome (Clod) by intraperitoneal injection (i.p.). Scale bar, 15 $\mu$ m for spleen; 70 $\mu$ m for sciatic nerve. **(b)** F4/80 staining in spleen and sciatic nerve from NP-exposed animals with clodronate liposome applied on the nerve. Scale bar, 130 $\mu$ m for spleen and sciatic nerve.



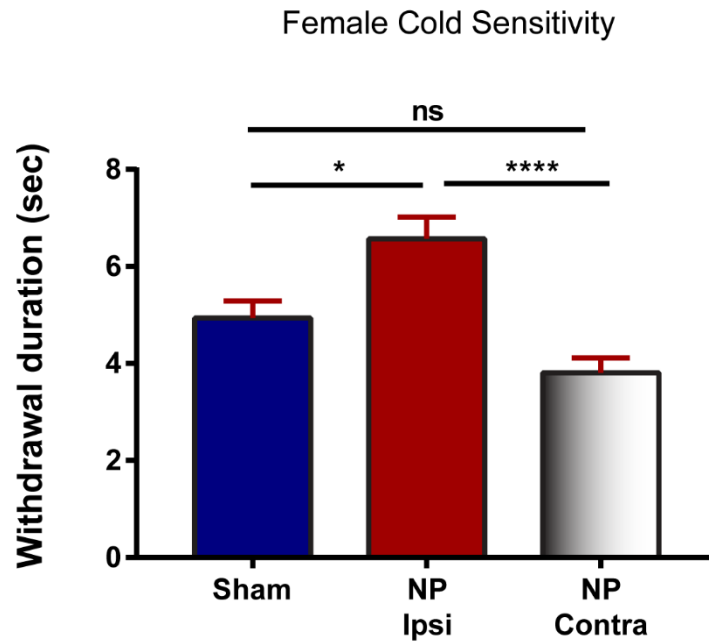

**Supplementary Figure 8. Acetone test in female mice.**

Cold sensitivity, measured by withdrawal duration (in seconds) using acetone test, in the ipsilateral and contralateral paws of NP-exposed female mice (n=24) and sham controls (n=20) 5 days after surgery. \* $p < 0.05$ , \*\*\*\* $p < 0.0001$ ; ns $> 0.05$  by Kruskal-Wallis test with Dunn's multiple comparisons test. Data are mean  $\pm$  SEM.

Female Sham

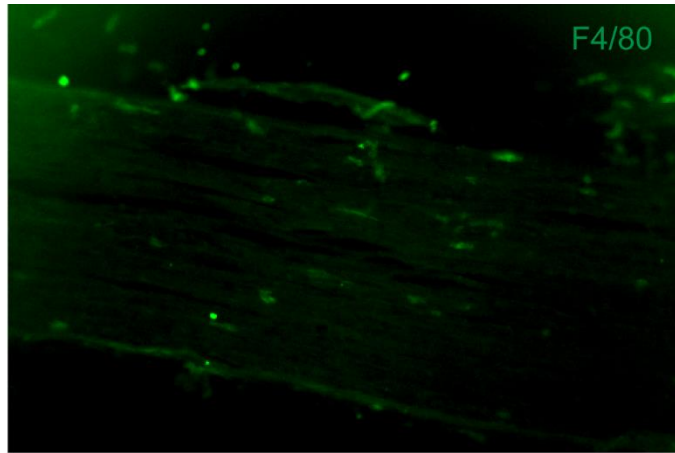

Female NP

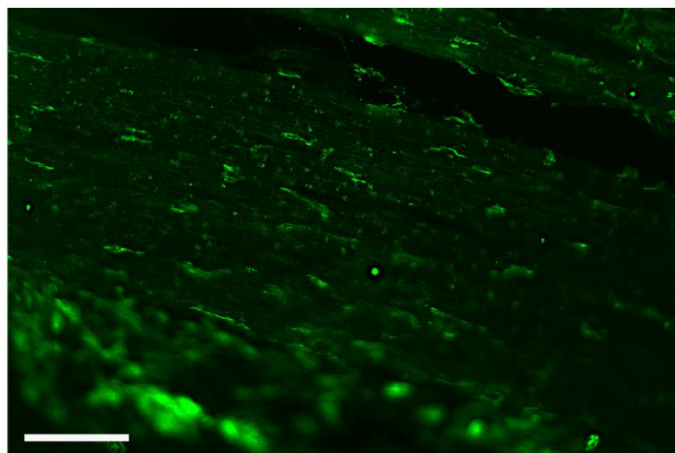

**Supplementary Figure 9. F4/80 staining in sciatic nerves from sham control or NP-exposed female mice at day 7.**

Scale bar, 100 $\mu$ m.

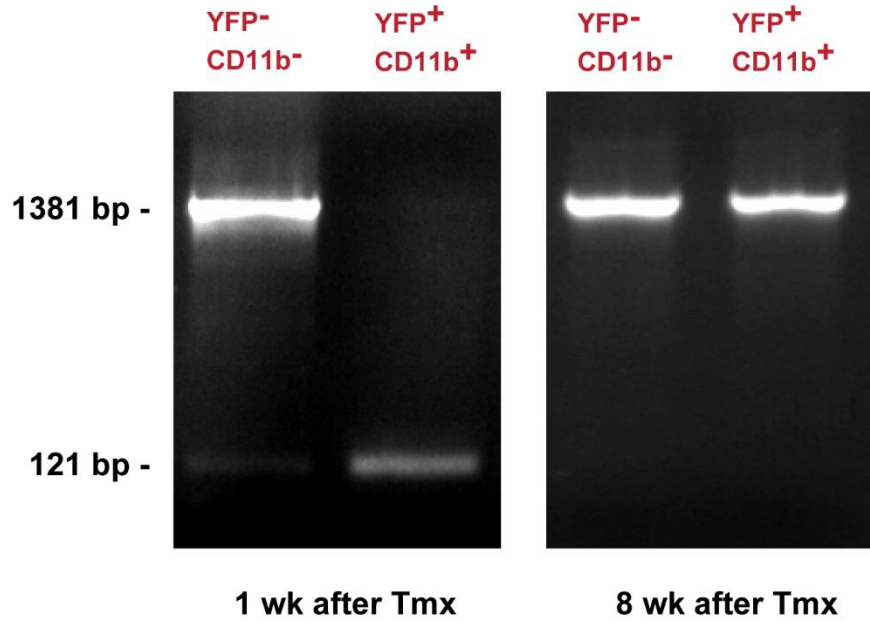

**Supplementary Figure 10. PCR analysis of BDNF recombination from the blood of *CX3CRI<sup>CreER/+</sup>;BDNF<sup>fl/fl</sup>* female mice.**

PCR analysis of the YFP<sup>-</sup>/CD11b<sup>-</sup> or YFP<sup>+</sup>/CD11b<sup>+</sup> cells sorted from the blood of *CX3CRI<sup>CreER/+</sup>;BDNF<sup>fl/fl</sup>* female mice one or eight weeks after tamoxifen treatment.

|             | NeuN <sup>+</sup> Cells | ATF3 <sup>+</sup> Cells |      |
|-------------|-------------------------|-------------------------|------|
| <b>Sham</b> | 3898                    | 31                      |      |
| <b>NP</b>   | 6285                    | 346                     | ns   |
| <b>SNI</b>  | 3367                    | 1619                    | **** |
| <b>CCI</b>  | 3122                    | 1250                    | **** |

**Supplementary Table 1. Total number of NeuN<sup>+</sup> and ATF3<sup>+</sup> cells quantified in DRG neurons.**

The number of NeuN<sup>+</sup> and ATF3<sup>+</sup> neurons was counted in the L4/5 DRGs from sham controls and animals with NP, SNI and CCI (4-7 sections, n= 4-7 animals per group). ns>0.05, \*\*\*\*  $p < 0.0001$  compared to corresponding sham controls by Kruskal-Wallis test with Dunn's multiple comparisons test.
